# Supplementary material for: Exon array analysis reveals neuroblastoma tumors have distinct alternative splicing patterns according to stage and MYCN amplification status
Source: Springer Nature journal article supplement (doi:10.1186/1755-8794-4-35), 2011-04-18

(A)

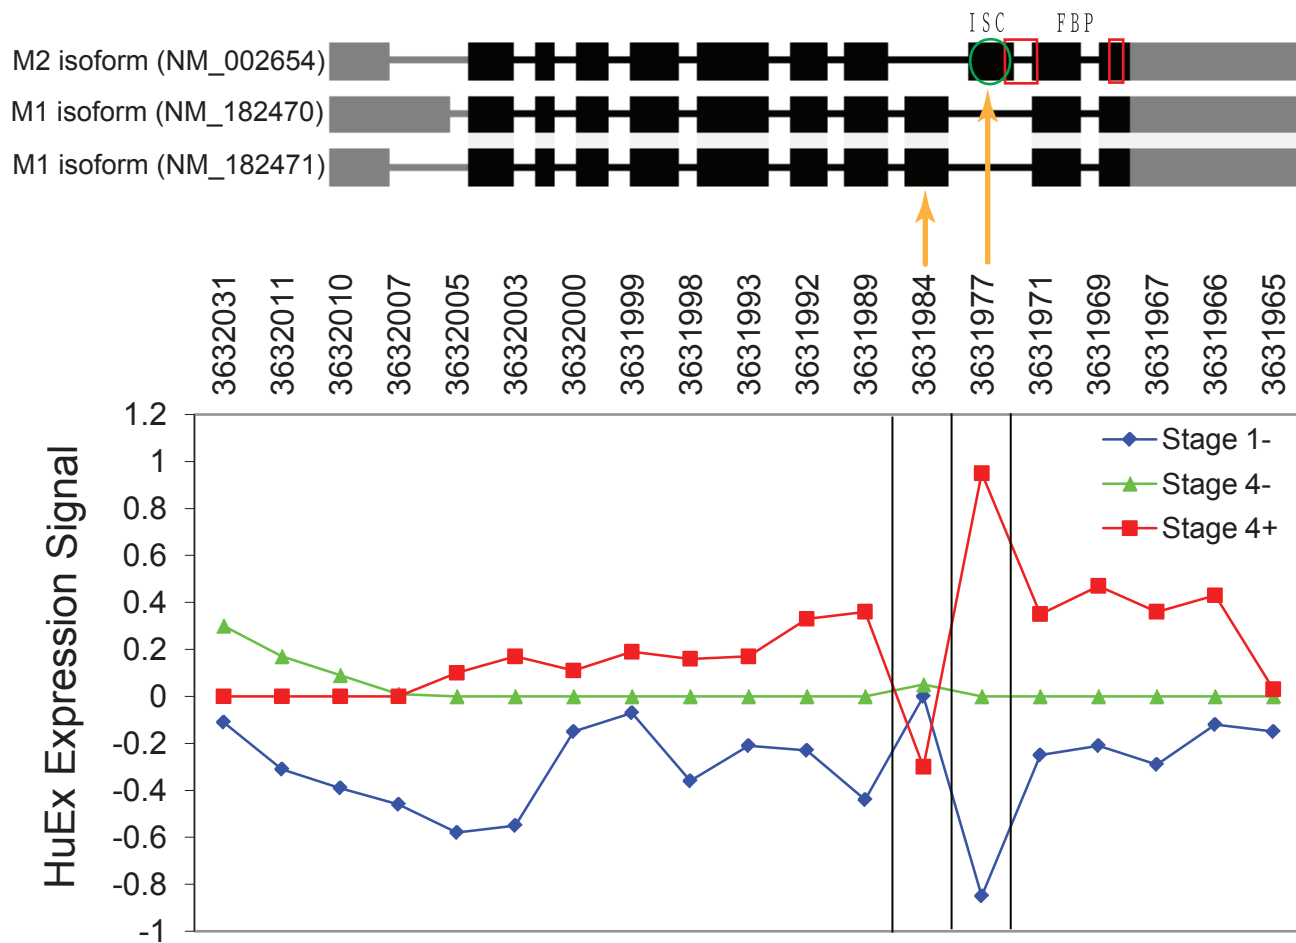

(B)

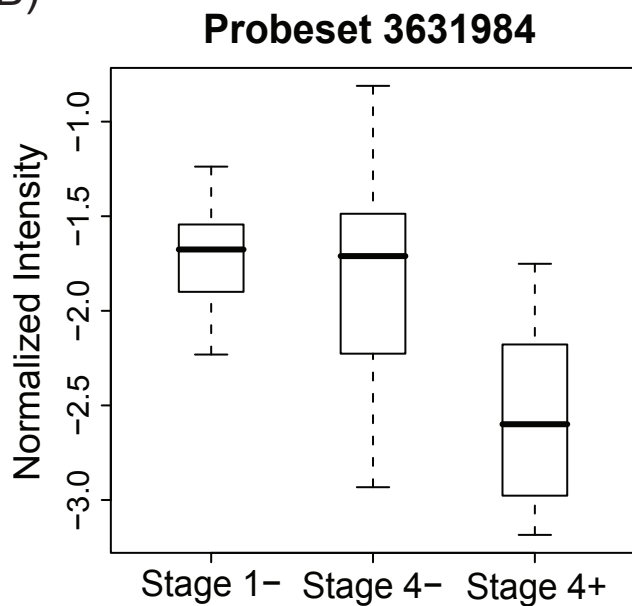

(C)

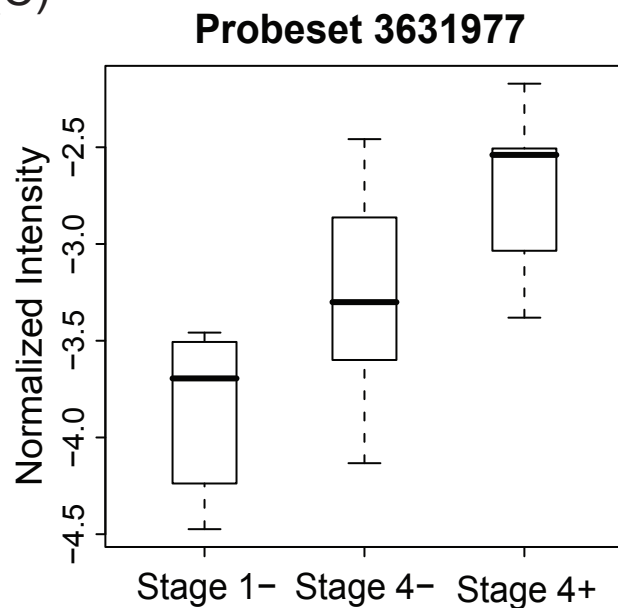

Supplement: 12920_2010_229_MOESM9_ESM.pdf [file 12920_2010_229_MOESM9_ESM.pdf]
